# Supplementary material for: A novel p–n junction Ag3PO4/BiPO4-based stabilized Pickering emulsion for highly efficient photocatalysis
Source: Royal Society of Chemistry journal article supplement (doi:10.1039/c4ra14294b), 2015-01-01
Supplement: c4ra14294b1.pdf [file c4ra14294b1.pdf]

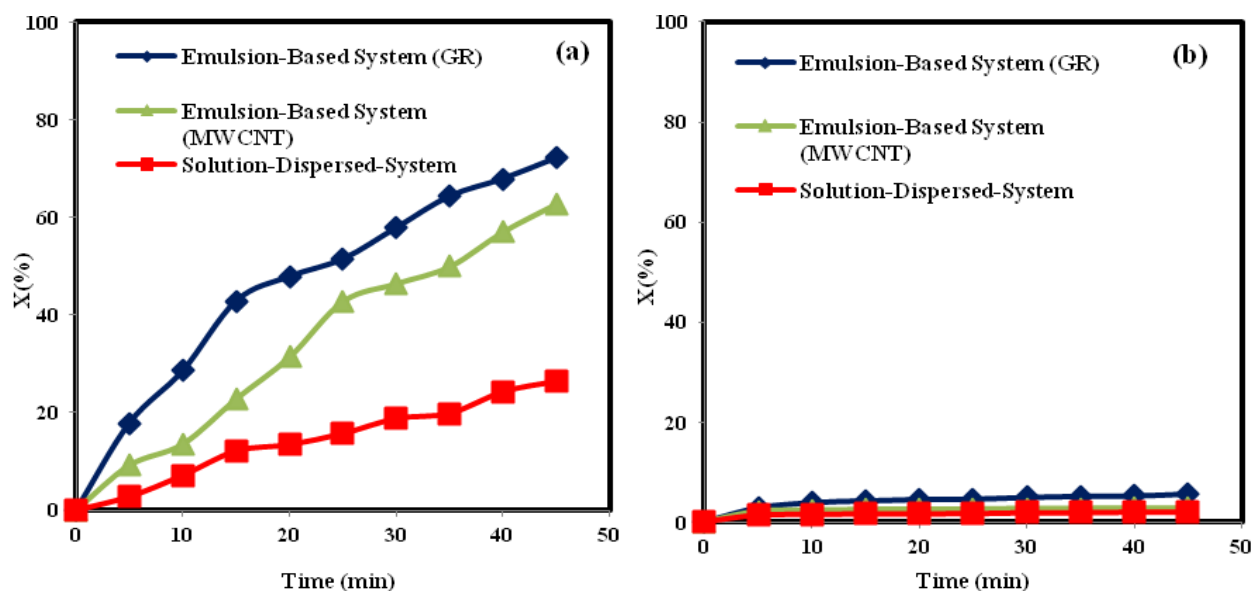

Fig. 1 The degradation efficiency of AB92 dye in the presence of P25 in both Pe-bp and solution dispersed systems under (a) UV and (b) visible light irradiation.
